# Supplementary material for: Effects of the COVID-19 Restrictions on Eating Behaviour and Eating Disorder Symptomology in Female Adolescents
Source: MDPI journal article supplement (doi:10.3390/ijerph19148480), 2022-07-11
Supplement: s1 [file s1]

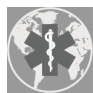

*Supplementary Materials*

# Effects of the COVID-19 Restrictions on Eating Behaviour and Eating Disorder Symptomology in Female Adolescents

**Table S1.** Means and standard deviations (SDs) of absolute measures and percentual changes of CIES factors before vs. during confinement by group (all changes occurred in a positive direction, indicating an increase in symptoms) (AN: anorexia nervosa, SRPD: self-reported psychiatric diagnosis, F1: restrictive eating, F2: overeating, F3: anxiety and depressive symptoms, F4: emotion regulation problems).

|                               | AN<br>(N=19) |       | Depression<br>(N=20) |       | SRPD<br>(N=45) |       | Control<br>(N=138) |       |
|-------------------------------|--------------|-------|----------------------|-------|----------------|-------|--------------------|-------|
|                               | Mean         | SD    | Mean                 | SD    | Mean           | SD    | Mean               | SD    |
| <b>Absolute measures</b>      |              |       |                      |       |                |       |                    |       |
| F1 before                     | 18.2         | 5.3   | 21.2                 | 5.3   | 21.0           | 4.6   | 19.0               | 4.2   |
| F1 during                     | 28.4         | 5.1   | 24.1                 | 5.9   | 24.0           | 5.6   | 21.2               | 4.9   |
| F2 before                     | 17.9         | 8.5   | 21.0                 | 7.0   | 21.7           | 7.6   | 18.5               | 5.5   |
| F2 during                     | 19.4         | 8.3   | 24.4                 | 8.9   | 25.4           | 8.9   | 21.4               | 7.0   |
| F3 before                     | 18.0         | 5.5   | 27.8                 | 6.7   | 25.6           | 6.4   | 19.8               | 5.2   |
| F3 during                     | 28.7         | 8.0   | 33.9                 | 7.8   | 32.0           | 5.8   | 25.4               | 6.7   |
| F4 before                     | 9.7          | 3.3   | 15.4                 | 4.8   | 13.1           | 3.8   | 10.4               | 3.2   |
| F4 during                     | 14.3         | 4.7   | 18.4                 | 4.0   | 15.7           | 4.0   | 13.0               | 4.2   |
| <b>Percentual changes (%)</b> |              |       |                      |       |                |       |                    |       |
| F1                            | 61.01        | 29.92 | 15.90                | 25.29 | 17.25          | 29.29 | 13.41              | 24.83 |
| F2                            | 11.11        | 20.85 | 17.05                | 27.07 | 22.49          | 39.88 | 16.66              | 22.24 |
| F3                            | 63.28        | 35.71 | 25.20                | 27.36 | 30.56          | 32.70 | 30.29              | 27.27 |
| F4                            | 51.55        | 36.99 | 25.09                | 32.91 | 25.09          | 32.91 | 26.70              | 31.45 |

**Table S2.** Means and SDs of SATAQ scores by group (SATAQ: Sociocultural Attitudes Towards Appearance Questionnaire)

| SATAQ           | Group      | N   | Mean | SD   |
|-----------------|------------|-----|------|------|
| Pressure        | AN         | 19  | 3.75 | 1.03 |
|                 | Depression | 20  | 3.37 | 1.38 |
|                 | SRPD       | 44  | 3.34 | 1.06 |
|                 | Control    | 134 | 2.68 | 1.14 |
| Awareness       | AN         | 19  | 3.56 | 1.10 |
|                 | Depression | 20  | 3.36 | 1.20 |
|                 | SRPD       | 45  | 3.30 | 0.94 |
|                 | Control    | 138 | 2.70 | 1.00 |
| Internalization | AN         | 19  | 3.47 | 1.02 |
|                 | Depression | 20  | 3.19 | 1.17 |
|                 | SRPD       | 45  | 3.31 | 1.00 |
|                 | Control    | 138 | 2.69 | 0.90 |

**Table S3.** Percentual rates of responses on usage of each coping strategy, mean and SDs of number of strategies used and mean overall helpfulness score of coping strategies (1=not helpful, 2=a little helpful, 3=fairly helpful, 4=helpful, 5=very helpful) by group

|                                            | AN         | Depression | SRPD       | Control    |
|--------------------------------------------|------------|------------|------------|------------|
| <b>Strategy Used (%)</b>                   |            |            |            |            |
| Yoga                                       | 31.6       | 10.0       | 46.7       | 34.1       |
| Daily routine                              | 89.5       | 75.0       | 84.4       | 89.9       |
| Day planning                               | 73.7       | 60.0       | 86.7       | 85.8       |
| Mild physical exercise                     | 94.7       | 50.0       | 80.0       | 85.5       |
| Enjoyable activities                       | 94.7       | 85.0       | 93.3       | 97.8       |
| Relaxing time with the family              | 78.9       | 65.0       | 77.8       | 79.7       |
| Playing with the family                    | 94.7       | 40.0       | 77.8       | 82.6       |
| Virtual social contact with friends        | 84.2       | 65.0       | 91.1       | 89.9       |
| Meal planning                              | 84.2       | 30.0       | 55.6       | 50.0       |
| Learn what you never had time to           | 52.6       | 30.0       | 64.4       | 73.2       |
| Virtual social contact with family         | 89.5       | 35.0       | 73.3       | 77.5       |
| Meditation                                 | 26.3       | 20.0       | 44.4       | 34.8       |
| Relaxation exercises                       | 36.8       | 25.0       | 62.2       | 58.7       |
| Positive situations diary                  | 15.8       | 20.0       | 48.9       | 27.5       |
| Mindfulness                                | 42.1       | 35.0       | 51.1       | 42.0       |
| Pleasant internet activities               | 57.9       | 70.0       | 71.1       | 70.3       |
| Positive thinking                          | 84.2       | 55.0       | 91.1       | 87.0       |
| Diaphragmatic, deep breathing              | 21.2       | 25.0       | 51.1       | 27.5       |
| (Self-) reinforcement                      | 47.4       | 50.0       | 71.1       | 65.2       |
| Cooking with the family                    | 73.7       | 60.0       | 51.1       | 60.9       |
| Interrupting thoughts/behaviours           | 36.8       | 60.0       | 57.8       | 27.5       |
| <b>Mean number of strategies used (SD)</b> | 13.1 (4.1) | 10.1 (1.0) | 14.3 (4.2) | 13.5 (4.1) |
| <b>Overall helpfulness score (SD)</b>      | 2.0 (0.86) | 1.4 (0.56) | 2.1 (0.9)  | 2.3 (0.8)  |
